# Supplementary material for: Theoretical investigation on carbon nucleation on nickel carbides at initial stages of single-walled carbon nanotube formation
Source: Royal Society of Chemistry journal article supplement (doi:10.1039/c4cp02837f), 2014-01-01
Supplement: c4cp02837f1.pdf [file c4cp02837f1.pdf]

## Supporting Information

# Theoretical investigation on carbon nucleation on nickel carbides at initial stages of single-walled carbon nanotube formations

*Zhimin Yang,<sup>†</sup> Qiang Wang,<sup>\*†</sup> Xiaoye Shan,<sup>†</sup> Shuo-Wang Yang,<sup>‡</sup> and Hongjun Zhu,<sup>\*†</sup>*

<sup>†</sup> Department of Applied Chemistry, College of Science, Nanjing Tech University,  
Nanjing 211816, P. R. China

<sup>‡</sup> Institute of High Performance Computing, 1 Fusionopolis Way, 16-16 Connexis,  
Singapore 138632

\*Corresponding E-mail: [wangqiang@njtech.edu.cn](mailto:wangqiang@njtech.edu.cn); [zhuhj@njtech.edu.cn](mailto:zhuhj@njtech.edu.cn)

Tel. / Fax: +86-25-83172358

- (1) **Table S1.** Geometric structure parameters of the optimized Ni<sub>55</sub>C<sub>n</sub> (n=5, 10, 15, and 20). S2
- (2) **Table S2.** Adsorption energy E<sub>a</sub> (eV) and chemical potential  $\mu$  (eV) of the carbon rings and caps on Ni<sub>55</sub>C<sub>20</sub> carbide or pure Ni<sub>55</sub> clusters. S5

**Table S1.** Geometric structure parameters of the optimized Ni<sub>55</sub>C<sub>n</sub> (n=5, 10, 15, and 20). As sketched in Fig. 3, the □<sub>4</sub>, □<sub>5</sub>, and □<sub>6</sub> denote the C atoms coordinated with four, five, or six Ni atoms, respectively. All values of the Ni-Ni bond length ( $R_{\text{Ni-Ni}}$ ), the Ni-C bond length ( $R_{\text{Ni-C}}$ ), the C-C bond length ( $R_{\text{C-C}}$ ) are given in angstrom (Å).

| Cluster                           | $R_{\text{Ni-Ni}}$                                                                                                                                                                                                                    | $R_{\text{Ni-C}}$                                                                                 | $R_{\text{C-C}}$                                                                                                                            | □ <sub>4</sub> | □ <sub>5</sub> | □ <sub>6</sub> |
|-----------------------------------|---------------------------------------------------------------------------------------------------------------------------------------------------------------------------------------------------------------------------------------|---------------------------------------------------------------------------------------------------|---------------------------------------------------------------------------------------------------------------------------------------------|----------------|----------------|----------------|
| Ni <sub>55</sub> C <sub>5a</sub>  | 2.29, 2.30, 2.56, 2.62, 2.63, 2.65, 2.88,<br>2.90, 2.91, 2.98, 2.99, 3.03, 3.07, 3.23,<br>3.24, 3.28                                                                                                                                  | 1.76, 1.78, 1.85, 1.94,<br>1.95, 1.98                                                             | 2.60, 2.75, 2.76, 2.85                                                                                                                      | -              | 3              | 2              |
| Ni <sub>55</sub> C <sub>5b</sub>  | 2.41, 2.45, 2.48, 2.50, 2.52, 2.58, 2.81,<br>2.84                                                                                                                                                                                     | 1.81, 1.83, 1.91, 1.94                                                                            | 3.65, 3.67                                                                                                                                  | -              | -              | 5              |
| Ni <sub>55</sub> C <sub>10a</sub> | 2.40, 2.41, 2.42, 2.44, 2.45, 2.46, 2.47,<br>2.48, 2.50, 2.51, 2.52, 2.53, 2.55, 2.57,<br>2.63, 2.68, 2.69, 2.90, 2.94, 2.95, 3.20,<br>3.47, 3.62                                                                                     | 1.80, 1.82, 1.83, 1.84,<br>1.85, 1.89, 1.92, 1.96                                                 | 3.05, 3.06, 3.35, 3.36,<br>3.63                                                                                                             | 5              | -              | 5              |
| Ni <sub>55</sub> C <sub>10b</sub> | 2.32, 2.36, 2.38, 2.39, 2.40, 2.41, 2.42,<br>2.43, 2.44, 2.45, 2.46, 2.47, 2.48, 2.49,<br>2.50, 2.51, 2.52, 2.53, 2.54, 2.55, 2.56,<br>2.57, 2.58, 2.59, 2.61, 2.62, 2.63, 2.64,<br>2.65, 2.68, 2.69, 2.76, 2.84, 2.86, 3.04,<br>3.15 | 1.77, 1.78, 1.80, 1.81,<br>1.82, 1.83, 1.84, 1.85,<br>1.86, 1.87, 1.88, 1.90,<br>1.92, 1.93, 2.04 | 2.85, 2.93, 3.40, 3.46,<br>3.47, 3.48, 3.50, 3.51,<br>3.52, 3.56, 4.46, 4.63,<br>4.66, 4.68, 4.72, 4.83,<br>4.84, 5.11, 5.30, 5.59,<br>5.72 | 2              | 7              | 1              |

|                                   |                                                                                                                                                                                                                                                                                                                                                                                          |                                                                                                                              |                                                                                                                                                                                                         |   |    |   |
|-----------------------------------|------------------------------------------------------------------------------------------------------------------------------------------------------------------------------------------------------------------------------------------------------------------------------------------------------------------------------------------------------------------------------------------|------------------------------------------------------------------------------------------------------------------------------|---------------------------------------------------------------------------------------------------------------------------------------------------------------------------------------------------------|---|----|---|
| Ni <sub>55</sub> C <sub>10c</sub> | 2.34, 2.36, 2.42, 2.43, 2.44, 2.47, 2.48,                                                                                                                                                                                                                                                                                                                                                | 1.80, 1.81, 1.82, 1.86,                                                                                                      |                                                                                                                                                                                                         |   |    |   |
|                                   | 2.50, 2.51, 2.52, 2.54, 2.55, 2.56, 2.59,<br>2.60, 2.61, 2.69, 2.70, 2.78, 2.84, 3.03                                                                                                                                                                                                                                                                                                    | 1.87, 1.90, 1.93, 1.94,<br>2.04                                                                                              | 3.51, 3.53, 3.64, 4.51                                                                                                                                                                                  | - | 5  | 5 |
| Ni <sub>55</sub> C <sub>10d</sub> | 2.44, 2.45, 2.47, 2.48, 2.49, 2.50, 2.51,<br>2.52, 2.55, 2.57, 2.58, 2.59, 2.61, 2.63,<br>2.64, 2.65, 2.66, 3.54, 3.55, 3.56, 3.59,<br>3.67, 3.68, 3.69                                                                                                                                                                                                                                  | 1.81, 1.82, 1.85, 1.86,<br>1.88, 1.89, 1.91, 1.92,<br>1.98, 1.99                                                             | 3.44, 3.45, 3.55, 3.56,<br>3.57, 3.57, 3.58                                                                                                                                                             | 3 | 5  | 2 |
|                                   | 2.32, 2.35, 2.36, 2.39, 2.41, 2.43, 2.44,<br>2.45, 2.46, 2.47, 2.48, 2.51, 2.52, 2.53,<br>2.54, 2.55, 2.56, 2.57, 2.58, 2.59, 2.60,<br>2.61, 2.62, 2.63, 2.66, 2.67, 2.68, 2.69,<br>2.70, 2.72, 2.73, 2.75, 2.76, 2.77, 2.78,<br>2.89, 2.99, 3.30, 3.41, 3.43, 3.46, 3.51,<br>3.52, 3.55, 3.56, 3.61, 3.63, 3.64, 3.68,<br>3.69, 3.70, 3.71, 3.73, 3.74, 3.75, 3.76,<br>3.79, 3.82, 3.84 | 1.75, 1.77, 1.78, 1.79,<br>1.80, 1.81, 1.82, 1.83,<br>1.84, 1.87, 1.88, 1.89,<br>1.90, 1.91, 1.92, 1.94,<br>1.95, 1.96, 1.99 | 2.88, 3.09, 3.23, 3.25,<br>3.29, 3.34, 3.39, 3.44,<br>3.45, 3.46, 3.47, 3.48,<br>3.49, 3.50, 3.52, 3.53,<br>3.54, 3.69, 3.76, 4.36,<br>4.43, 4.46, 4.49, 4.45,<br>4.57, 4.58, 4.90, 4.91,<br>4.92, 4.95 | 3 | 9  | 3 |
| Ni <sub>55</sub> C <sub>15b</sub> | 2.34, 2.37, 2.38, 2.41, 2.42, 2.43, 2.44,                                                                                                                                                                                                                                                                                                                                                | 1.78, 1.79, 1.80, 1.81,                                                                                                      | 2.77, 2.79, 2.94, 2.97,                                                                                                                                                                                 |   |    |   |
|                                   | 2.45, 2.46, 2.47, 2.49, 2.50, 2.51, 2.52,                                                                                                                                                                                                                                                                                                                                                | 1.82, 1.83, 1.84, 1.85,                                                                                                      | 3.04, 3.31, 3.35, 3.37,                                                                                                                                                                                 |   |    |   |
|                                   | 2.53, 2.54, 2.55, 2.56, 2.57, 2.58, 2.59,                                                                                                                                                                                                                                                                                                                                                | 1.86, 1.87, 1.88, 1.89,                                                                                                      | 3.41, 3.43, 3.45, 3.47,                                                                                                                                                                                 |   |    |   |
|                                   | 2.61, 2.63, 2.64, 2.65, 2.67, 2.68, 2.69,                                                                                                                                                                                                                                                                                                                                                | 1.90, 1.91, 1.92, 1.93,                                                                                                      | 3.49, 3.52, 3.53, 3.55,                                                                                                                                                                                 | 2 | 12 | 1 |
|                                   | 2.70, 2.74, 2.78, 3.03, 3.24, 3.29, 3.36,<br>3.44, 3.52, 3.56, 3.61, 3.62, 3.63, 3.64,                                                                                                                                                                                                                                                                                                   | 1.94, 1.95, 1.96, 1.97,<br>2.00                                                                                              | 3.56, 3.58, 3.59, 3.66,<br>3.84, 4.70, 4.73, 4.74,                                                                                                                                                      |   |    |   |

|  |                                                                                                                                                                                                                                                                                                                                                                                                                                                                                                                 |                                                                                                                                                                                                                                                                      |   |   |   |
|--|-----------------------------------------------------------------------------------------------------------------------------------------------------------------------------------------------------------------------------------------------------------------------------------------------------------------------------------------------------------------------------------------------------------------------------------------------------------------------------------------------------------------|----------------------------------------------------------------------------------------------------------------------------------------------------------------------------------------------------------------------------------------------------------------------|---|---|---|
|  | 3.65, 3.66, 3.67, 3.68, 3.69, 3.71, 3.76,<br>3.78                                                                                                                                                                                                                                                                                                                                                                                                                                                               | 4.75, 4.76, 4.78, 4.80,<br>4.84, 4.86, 4.91                                                                                                                                                                                                                          |   |   |   |
|  | 2.36, 2.39, 2.40, 2.41, 2.42, 2.43, 2.44,<br>2.45, 2.46, 2.47, 2.48, 2.49, 2.50, 2.51,<br>2.52, 2.53, 2.54, 2.55, 2.56, 2.57, 2.59, 1.78, 1.79, 1.80, 1.81,<br>2.60, 2.62, 2.63, 2.64, 2.65, 2.66, 2.67, 1.82, 1.83, 1.84, 1.85,<br>2.68, 2.70, 2.72, 2.73, 2.74, 2.75, 2.80, 1.86, 1.87, 1.88, 1.89,<br>2.93, 2.95, 3.19, 3.30, 3.36, 3.44, 3.45, 1.90, 1.91, 1.92, 1.93,<br>3.48, 3.51, 3.53, 3.54, 3.56, 3.57, 3.58, 1.94, 1.95, 1.96, 1.97<br>3.59, 3.61, 3.62, 3.64, 3.66, 3.67, 3.68,<br>3.70, 3.78, 3.80 | 2.85, 2.88, 2.89, 3.02,<br>3.032, 3.04, 3.08, 3.11,<br>3.12, 3.18, 3.24, 3.26,<br>3.28, 3.31, 3.33, 3.36,<br>3.37, 3.38, 3.40, 3.42,<br>3.44, 3.52, 3.55, 3.56,<br>3.58, 3.65, 3.77, 3.86,<br>4.01, 4.51, 4.58, 4.63,<br>4.73, 4.78, 4.79, 4.81,<br>4.82, 4.88, 4.95 | 9 | 6 | 5 |

**Table S2.** Adsorption energy  $E_a$  (eV) and chemical potential  $\mu$  (eV) of the carbon rings and caps attached on the  $\text{Ni}_{55}\text{C}_{20}$  carbide or pure  $\text{Ni}_{55}$  clusters.

| System                                    | $E_a$ (eV) | $\mu$ (eV) | System                       | $E_a$ (eV) | $\mu$ (eV) |
|-------------------------------------------|------------|------------|------------------------------|------------|------------|
| $\text{Ni}_{55}\text{C}_{20}\text{Ring5}$ | 6.96       | 1.32       | $\text{Ni}_{55}\text{Ring5}$ | 5.91       | 1.53       |
| $\text{Ni}_{55}\text{C}_{20}\text{Ring6}$ | 3.05       | 1.24       | $\text{Ni}_{55}\text{Ring6}$ | 5.65       | 0.81       |
| $\text{Ni}_{55}\text{C}_{20}\text{Cap20}$ | 5.86       | 0.58       | $\text{Ni}_{55}\text{Cap20}$ | 5.56       | 0.59       |
| $\text{Ni}_{55}\text{C}_{20}\text{Cap21}$ | 11.92      | 0.41       | $\text{Ni}_{55}\text{Cap21}$ | 10.15      | 0.50       |
| $\text{Ni}_{55}\text{C}_{20}\text{Cap39}$ | 19.24      | 0.22       | $\text{Ni}_{55}\text{Cap39}$ | 20.82      | 0.22       |
| $\text{Ni}_{55}\text{C}_{20}\text{Cap40}$ | 11.61      | 0.24       | $\text{Ni}_{55}\text{Cap40}$ | 16.60      | 0.12       |
